# Supplementary material for: Recombination junctions from antibody isotype switching classify immune and DNA repair dysfunction
Source: Nat Commun. 2025 Dec 19;16:11331. doi: 10.1038/s41467-025-67206-5 (PMC12722312; doi:10.1038/s41467-025-67206-5)
Supplement: Supplementary file 4 — Supplementary Data 3 [file 41467_2025_67206_MOESM4_ESM.xlsx]

## Sheet: Table S1
cohort	donor	Diagnosis full	Diagnosis	Sex	Age	Timepoint	PnPS	Tetanus	Diphteria	IV	Treatment	EUROclass	Complication	Splenomegaly	Lymphoproliferation	Lung	PMID
training	FB_01	PI3K deficiency, initial IgG2/4 subclass deficiency IgA reduction, Hyper-IgM	PI3K	male	38	t1				ivig	co-trixomazol				Lymphadenopathy (LA)	no	this study
training	FB_02	Control Donor	control	female	34	t1											this study
training	FB_03	IgG1 subclass deficiency	subclass	female	46	t1						smB+21norm	c		Lymphadenopathy (LA)		this study
training	FB_04	Control Donor	control	male	32	t1											this study
training	FB_05	Control Donor	control	male	27	t1											this study
training	FB_06	IgG2 subclass deficiency	subclass	female	35	t1	negative	positive	positive			smB+21norm	io				this study
training	FB_07	Control Donor	control	male	35	t1											this study
training	FB_08	Control Donor	control	female	44	t1											this study
training	FB_09	Control Donor	control	female	42	t1											this study
training	FB_10	Kabuki Syndrome	Kabuki	female	62	t1	negative	negative	negative	scIg	prednison	smB+21low	c	yes		Interstitial lung disease (ILD)	this study
training	FB_11	Undetectable IgA and IgM/specific antibody defect PnPS, IgG4 subclass deficiency	IgG4def	male	61	t1	negative	positive	positive	scIg		smB-21norm	io				this study
training	FB_12	IgG1 subclass deficiency	subclass	female	70	t1		positive	positive			smB+21norm	io				this study
training	FB_13	Common variable immunodeficiency	atypical	female	57	t1				scIg		smB+21norm	io	yes			this study
training	FB_14	Control Donor	control	female	35	t1											this study
training	FB_15	Common variable immunodeficiency	CVID	male	37	t1				scIg		smB-21low	c	yes			this study
training	FB_16	Control Donor	control	female	50	t1											this study
training	FB_17	Common variable immunodeficiency with complications	CVID	female	64	t1		negative	negative	scIg		smB-21norm	c	yes			this study
training	FB_18	Control Donor	control	female	52	t1											this study
training	FB_19	Common variable immunodeficiency with complications	CVID	male	48	t1	negative	positive	negative	scIg	prednison	smB-21low	c	yes	Lymphadenopathy (LA)	Interstitial lung disease (ILD)	this study
training	FB_20	Control Donor	control	female	54	t1											this study
training	FB_21	Common variable immunodeficiency	atypical	female	45	t1				scIg		smB+21norm	io				this study
training	FB_22	AID deficiency, IgG lacking, IgA low, hyper IgM	AID	male	49	t1				scIg	co-trixomazol				Lymphadenopathy (LA)		this study
training	FB_23	Control Donor	control	female	44	t1											this study
training	FB_24	Common variable immunodeficiency	CVID	female	33	t1				scIg		smB-21low	c	yes		Granulomatous and Lymphocytic Interstitial Lung Diseases (GLILD)	this study
training	FB_25	Common variable immunodeficiency	CVID	female	29	t1				scIg	cortison	smB-21low	c	yes	Lymphadenopathy (LA)	Granulomatous and Lymphocytic Interstitial Lung Diseases (GLILD)	this study
training	FB_26	Control Donor	control	female	34	t1											this study
training	FB_27	Common variable immunodeficiency	CVID	male	52	t1				scIg	infliximab	smB-21low	c				this study
training	FB_28	Common variable immunodeficiency	CVID	female	30	t1		negative	positive	scIg		smB-21low	c	yes			this study
training	FB_29	Control Donor	control	male	54	t1											this study
training	FB_30	Common variable immunodeficiency	CVID	male	44	t1	negative	negative	negative	scIg		smB-21norm	c	yes			this study
training	FB_31	Common variable immunodeficiency	CVID	female	50	t1				ivig	steroid	smB-21low	c			Granulomatous and Lymphocytic Interstitial Lung Diseases (GLILD)	this study
training	FB_32	NFKB2 deficiency	NFKB2	female	30	t1				scIg		smB-21norm	io				this study
training	FB_33	Control Donor	control	female	32	t1											this study
training	FB_34	ICOS deficiency IgG&IgA reduced, IgM normal	ICOS	male	27	t1		positive	positive	ivig		smB-21low	c				this study
training	FB_35	IgG2 subclass deficiency	subclass	female	51	t1	negative	positive	positive			smB+21norm	io				this study
testing	FB_36	TNFRSF13B deficiency	TNFRSF13B	female	64	t1		negative	negative	scIg	prednison	smB-21low	c	yes	Lymphadenopathy (LA)	Granulomatous and Lymphocytic Interstitial Lung Diseases (GLILD)	this study
testing	FB_09	Control Donor	control	female	36	t2											this study
testing	FB_38	PI3K deficiency, oligoclonal IgG	PI3K	female	21	t1				ivig	sirolimus		c	yes	Lymphadenopathy (LA)		this study
testing	FB_39	Control Donor	control	female	23	t1											this study
testing	FB_40	Control Donor	control	male	54	t1											this study
testing	FB_32	NFKB2 deficiency	NFKB2	female	32	t2				scIg		smB-21norm	io				this study
testing	FB_42	Common variable immunodeficiency	CVID	female	26	t1	negative	positive	positive	scIg		smB-21low	c		Lymphadenopathy (LA)		this study
testing	FB_09	Control Donor	control	female	41	t3											this study
testing	FB_44	Common variable immunodeficiency	CVID	female	43	t1	positive	positive		scIg		smB-21low	c		Lymphadenopathy (LA)		this study
testing	FB_45	Control Donor	control	male	52	t1											this study
testing	FB_46	TNFRSF13B deficiency	TNFRSF13B	male	48	t1						smB-21low	c		Lymphadenopathy (LA)	Interstitial lung disease (ILD)	this study
testing	FB_47	AID deficiency	AID	male	41	t1						smB+21norm	c				this study
testing	FB_48	TNFRSF13B deficiency	TNFRSF13B	female	23	t1	negative	positive	positive	ivig		smB-21low	c	yes			this study
testing	FB_49	Control Donor	control	female	45	t1											this study
testing	FB_50	Common variable immunodeficiency	CVID	male	21	t1				ivig		smB-21low	c	yes			this study
testing	FB_32	NFKB2 deficiency	NFKB2	female	29	t3				ivig		21norm	io				this study
testing	FB_52	Control Donor	control	male	26	t1											this study
testing	FB_53	Control Donor	control	male	64	t1											this study
testing	FB_54	Control Donor	control	male	29	t1											this study
testing	FB_55	Control Donor	control	male	40	t1											this study
testing	FB_56	Common variable immunodeficiency	CVID	male	29	t1				scIg		smB-21low	c	yes		Interstitial lung disease (ILD)	this study
testing	FB_57	Common variable immunodeficiency	CVID	female	48	t1	negative	negative	negative	scIg		smB-21low	c	yes			this study
testing	FB_58	TNFRSF13B deficiency	TNFRSF13B	male	42	t1		positive	positive	ivig		smB-21low	c	yes		Granulomatous and Lymphocytic Interstitial Lung Diseases (GLILD)	this study
testing	FB_59	Control Donor	control	female	39	t1											this study
testing	FB_61	Control Donor	control	female	37	t1											this study
testing	FB_62	Control Donor	control	male	60	t1											this study
testing	FB_63	Common variable immunodeficiency	CVID	male	38	t1				scIg		smB-21norm	io				this study
testing	FB_64	Control Donor	control	female	36	t1											this study
testing	FB_65	Common variable immunodeficiency	CVID	male	44	t1				scIg		smB+21norm	io	yes			this study
testing	FB_66	Common variable immunodeficiency	CVID	male	47	t1				scIg		smB-21norm	io	yes			this study
validation	AID_1	[AID deficiency] AICDA Hom p.Arg98X	AID	male	20	t1											this study
validation	ATM1	[ATM deficiency] ATM p.Gln1852ProfsX5	ATM	female	6	t1											33547824
validation	ATM2	[ATM deficiency] ATM Hom large deletion	ATM	female	10	t1											33547824
validation	BRCA1_1	[BRCA1 deficiency] BRCA1 3171ins5	BRCA1	female	57	t1											25646469
validation	C8	Control Donor	control	NA	NA	t1											this study
validation	C7	Control Donor	control	NA	NA	t1											this study
validation	C9	Control Donor	control	NA	NA	t1											this study
validation	Lig4_1	Ligase IV Syndrome	LIG4	NA	4	t1											15657289
validation	NIPBL_1	[NIPBL deficiency] NIPBL c.6647A>G;p.Y2216C	NIPBL	female	3	t1											23960188
validation	ATM3	[ATM deficiency] ATM Hom. p.Q1862RfsX25	ATM	female	13	t1											this study
validation	ATM7	[ATM deficiency] ATM Com Het c.2922-4A>G+ p.Gly2023Arg	ATM	male	10	t1											this study
validation	ATM8	[ATM deficiency] ATM Hom p.Gln222Ter	ATM	male	6	t1											33547824
validation	BRCA1_2	[BRCA1 deficiency] BRCA1 c.3048_3052dup	BRCA1	NA	57	t1											25646469
validation	BRCA1_5	[BRCA1 deficiency] BRCA1 c.220C>T	BRCA1	NA	52	t1											25646469
validation	BRCA1_3	[BRCA1 deficiency] BRCA1 Hom p.V1238M	BRCA1	female	10	t1											this study
validation	C1	Control Donor	control	male	6	t1											19075292
validation	C2	Control Donor	control	female	3	t1											19075292
validation	C3	Control Donor	control	male	3	t1											19075292
validation	C4	Control Donor	control	male	4	t1											19075292
validation	C5	Control Donor	control	NA	6	t1											38280573
validation	C6	Control Donor	control	NA	13	t1											38280573
