# Supplementary material for: Recombination junctions from antibody isotype switching classify immune and DNA repair dysfunction
Source: Nat Commun. 2025 Dec 19;16:11331. doi: 10.1038/s41467-025-67206-5 (PMC12722312; doi:10.1038/s41467-025-67206-5)
Supplement: Supplementary file 5 — Supplementary Data 2 [file 41467_2025_67206_MOESM5_ESM.xlsx]

## Sheet: TableS1_features
Category	Feature	robust.features.human	robust.features.mouse	robust.features.CH12	Description
Diversity	clusters	TRUE	TRUE	TRUE	number of clusters after filtering in 1,000 reads
Diversity	clusters_eff	TRUE	TRUE	TRUE	from the entropy of the cluster size distribution (pre-filtering) in 1,000 reads
Diversity	cluster_size_mean	TRUE	TRUE	TRUE	average fraction of reads in clusters in 1,000 reads
Diversity	cluster_size_std	TRUE	TRUE	TRUE	standard deviation of the fraction of reads in clusters in 1,000 reads
Diversity	cluster_gini	TRUE	TRUE	TRUE	Gini coefficient of clusters (post-filtering) in 1,000 reads
Diversity	cluster_entropy	TRUE	TRUE	TRUE	entropy of clusters (post-filtering) in 1,000 reads
Diversity	cluster_inverse_simpson	TRUE	TRUE	TRUE	inverse simpson coefficient of clusters (post-filtering) in 1,000 reads
Diversity	occupancy_top_clone	TRUE	TRUE	TRUE	fraction of reads in the biggest cluster in 1,000 reads
Diversity	occupancy_big_clones	TRUE	TRUE	TRUE	fraction of reads in clusters with more than 1% of reads in 1,000 reads
Isotypes	alpha_ratio_clusters	TRUE	TRUE	TRUE	percentage of SA clusters
Isotypes	pct_clusters_SA1	TRUE	FALSE	FALSE	percentage of SA1 clusters
Isotypes	pct_clusters_SA2	FALSE	FALSE	FALSE	percentage of SA2 clusters
Isotypes	pct_clusters_SE	FALSE	FALSE	FALSE	percentage of SE clusters
Isotypes	pct_clusters_SG1	TRUE	FALSE	FALSE	percentage of SG1 clusters
Isotypes	pct_clusters_SG2	TRUE	FALSE	FALSE	percentage of SG2 clusters
Isotypes	pct_clusters_SG3	TRUE	FALSE	FALSE	percentage of SG3 clusters
Isotypes	pct_clusters_SG4	TRUE	FALSE	FALSE	percentage of SG4 clusters
Isotypes	pct_clusters_SM	FALSE	FALSE	FALSE	percentage of SM clusters
Isotypes	pct_clusters_Sa	FALSE	TRUE	TRUE	percentage of Sa clusters
Isotypes	pct_clusters_Sg3	FALSE	TRUE	FALSE	percentage of Sg3 clusters
Isotypes	pct_clusters_Sg2b	FALSE	TRUE	FALSE	percentage of Sg2b clusters
Isotypes	pct_clusters_Sg2c	FALSE	TRUE	FALSE	percentage of Sg2c clusters
Isotypes	pct_clusters_Sm	FALSE	FALSE	FALSE	percentage of Sm clusters
Isotypes	pct_clusters_Sg1	FALSE	FALSE	FALSE	percentage of Sg1 clusters
Structural	pct_templated_inserts	FALSE	FALSE	FALSE	frequency of >50nt templated inserts over the dataset
Structural	pct_inversions	TRUE	TRUE	TRUE	percentage of inversional events
Structural	pct_duplications	TRUE	TRUE	TRUE	percentage of duplication events
Structural	duplication_size_mean	FALSE	FALSE	FALSE	average size of duplications
Structural	inversion_size_mean	FALSE	FALSE	FALSE	average size of inversions
Context	homology_score_fw	TRUE	TRUE	TRUE	fraction of breakpoints occurring at the different degrees of 50nt homology (same orientation)
Context	homology_score_rv	TRUE	TRUE	TRUE	fraction of breakpoints occurring at the different degrees of 50nt homology (opposite orientation)
Context	donor_score_S	TRUE	TRUE	TRUE	average frequency of G or C nucleotides around donor switch-joints
Context	donor_score_W	TRUE	TRUE	TRUE	average frequency of A or T nucleotides around donor switch-joints
Context	donor_score_WGCW	TRUE	TRUE	TRUE	average frequency of WGCW motifs around donor switch-joints
Context	donor_score_GAGCT	TRUE	TRUE	TRUE	average frequency of GAGCT motifs around donor switch-joints
Context	donor_score_GGGST	TRUE	TRUE	TRUE	average frequency of GGGST motifs around donor switch-joints
Context	donor_complexity	TRUE	TRUE	TRUE	number of observed 5mers / number of possible 5mers weighted by CSR junction frequency) in 50nt bins of the donor switch regions
Context	acceptor_score_S	TRUE	TRUE	TRUE	average frequency of G or C nucleotides around acceptor switch-joints
Context	acceptor_score_W	TRUE	TRUE	TRUE	average frequency of A or T nucleotides around acceptor switch-joints
Context	acceptor_score_WGCW	FALSE	FALSE	FALSE	average frequency of WGCW motifs around acceptor switch-joints
Context	acceptor_score_GAGCT	TRUE	TRUE	TRUE	average frequency of GAGCT motifs around acceptor switch-joints
Context	acceptor_score_GGGST	TRUE	TRUE	TRUE	average frequency of GGGST motifs around acceptor switch-joints
Context	acceptor_complexity	FALSE	FALSE	FALSE	number of observed 5mers / number of possible 5mers weighted by CSR junction frequency) in 50nt bins of the acceptor switch regions
Context	homology	TRUE	TRUE	TRUE	number of homologous nucleotides around S region breakpoints
Context	untemplated_inserts	TRUE	TRUE	TRUE	number of untemplated nucleotides around S region breakpoints
Context	pct_blunt	FALSE	FALSE	FALSE	percentage of CSR joints occuring without inserts or homology
Breaks	read_length_mean	TRUE	TRUE	TRUE	average size of CSR joint reads
Breaks	read_length_std	FALSE	FALSE	FALSE	standard deviation of CSR joint reads
Breaks	GC_content_mean	FALSE	FALSE	FALSE	average GC content of CSR joint reads
Breaks	GC_content_std	FALSE	FALSE	FALSE	standard deviation of GC content of CSR joint reads
Breaks	read_length_mean_SA	TRUE	TRUE	TRUE	average size of SA CSR joint reads
Breaks	read_length_mean_SG	TRUE	TRUE	FALSE	average size of SG CSR joint reads
Breaks	read_length_std_SA	FALSE	FALSE	FALSE	standard deviation of size of SA CSR joint reads
Breaks	read_length_std_SG	TRUE	TRUE	FALSE	standard deviation of size of SG CSR joint reads
Breaks	pct_direct_switch	TRUE	TRUE	TRUE	percentage of breaks from Sm to another S region
Breaks	pct_sequential_switch	TRUE	TRUE	FALSE	percentage of breaks between two different S regions, but not SM
Breaks	pct_intraswitch_deletion	TRUE	TRUE	TRUE	percentage of intra-switch deletions within the same S region
Breaks	intraswitch_size_mean	FALSE	FALSE	FALSE	average size of intra-switch deletions
Breaks	intraswitch_size_std	FALSE	FALSE	FALSE	standard deviation of the size of intra-switch deletions
Breaks	break_dispersion_SM	FALSE	FALSE	FALSE	standard deviation of breakpoint positions in SM
Breaks	break_dispersion_SA	FALSE	FALSE	FALSE	standard deviation of breakpoint positions in SA
Breaks	break_dispersion_SG	FALSE	FALSE	FALSE	standard deviation of breakpoint positions in SG
Breaks	break_dispersion_SA1	FALSE	FALSE	FALSE	standard deviation of breakpoint positions in SA1
Breaks	break_dispersion_SA2	FALSE	FALSE	FALSE	standard deviation of breakpoint positions in SA2
Breaks	break_dispersion_SG1	FALSE	FALSE	FALSE	standard deviation of breakpoint positions in SG1
Breaks	break_dispersion_SG2	FALSE	FALSE	FALSE	standard deviation of breakpoint positions in SG2
Breaks	break_dispersion_SG2B	FALSE	FALSE	FALSE	standard deviation of breakpoint positions in SG2B
Breaks	break_dispersion_SG2C	FALSE	FALSE	FALSE	standard deviation of breakpoint positions in SG2C
Breaks	break_dispersion_SG3	FALSE	FALSE	FALSE	standard deviation of breakpoint positions in SG3
Breaks	break_dispersion_SG4	TRUE	FALSE	FALSE	standard deviation of breakpoint positions in SG4
Breaks	pct_breaks_SM_SM	FALSE	FALSE	FALSE	percentage of breaks connecting SM and SM
Breaks	pct_breaks_SM_SG	TRUE	TRUE	FALSE	percentage of breaks connecting SM and SG
Breaks	pct_breaks_SG_SG	TRUE	TRUE	FALSE	percentage of breaks connecting SG and SG
Breaks	pct_breaks_SM_SA	TRUE	TRUE	TRUE	percentage of breaks connecting SM and SA
Breaks	pct_breaks_SG_SA	TRUE	TRUE	FALSE	percentage of breaks connecting SG and SA
Breaks	pct_breaks_SA_SA	TRUE	TRUE	TRUE	percentage of breaks connecting SA and SA
Variants	somatic_variants	FALSE	FALSE	FALSE	number of variants classified as likely somatic (not germline)
Variants	frac_variants_transitions	FALSE	FALSE	FALSE	number of transitions occuring in the switch regions of a donor
Variants	num_variants	FALSE	FALSE	FALSE	amount of single nucleotide variants that were not annotated in dbSNP that did not segregate along different clusters of the same donor
